# Supplementary material for: Improved Prostate-Specific Membrane Antigen (PSMA) Stimulation Using a Super Additive Effect of Dutasteride and Lovastatin In Vitro
Source: MDPI journal article supplement (doi:10.3390/ijms241512338), 2023-08-02
Supplement: s1 [file s1]

## Supplementary figures

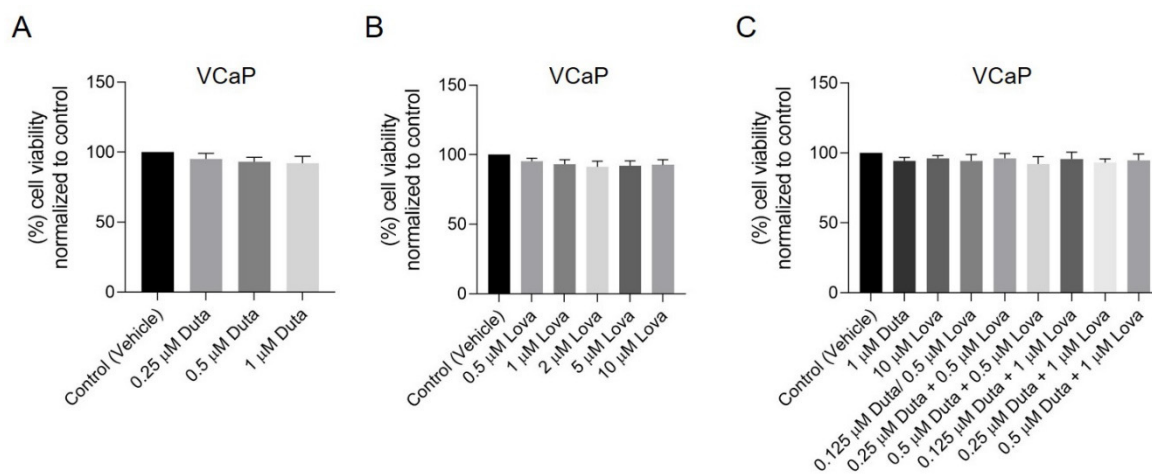

**Supplementary figure S1.** Cell proliferation was assessed by CellTiter-Glo 2.0 assay. VCaP cells were treated for 7 days with vehicle control (0.1% DMSO) or different concentrations of (A) Duta (0.25, 0.5 and 1  $\mu$ M), (B) Lova (0.5, 1, 2, 5 and 10  $\mu$ M) and (C) Duta + Lova combination (0.125  $\mu$ M Duta + 0.5  $\mu$ M Lova, 0.25  $\mu$ M Duta + 0.5  $\mu$ M Lova, 0.5  $\mu$ M Duta + 0.5  $\mu$ M Lova, 0.125  $\mu$ M Duta + 1  $\mu$ M Lova, 0.25  $\mu$ M Duta + 1  $\mu$ M Lova and 0.5  $\mu$ M Duta + 1  $\mu$ M Lova). The results are presented as percentage of cell viability normalized to control. Data is shown as mean with standard error of the mean ( $\pm$  SEM) of three independent experiments. DMSO, dimethyl sulfoxide.

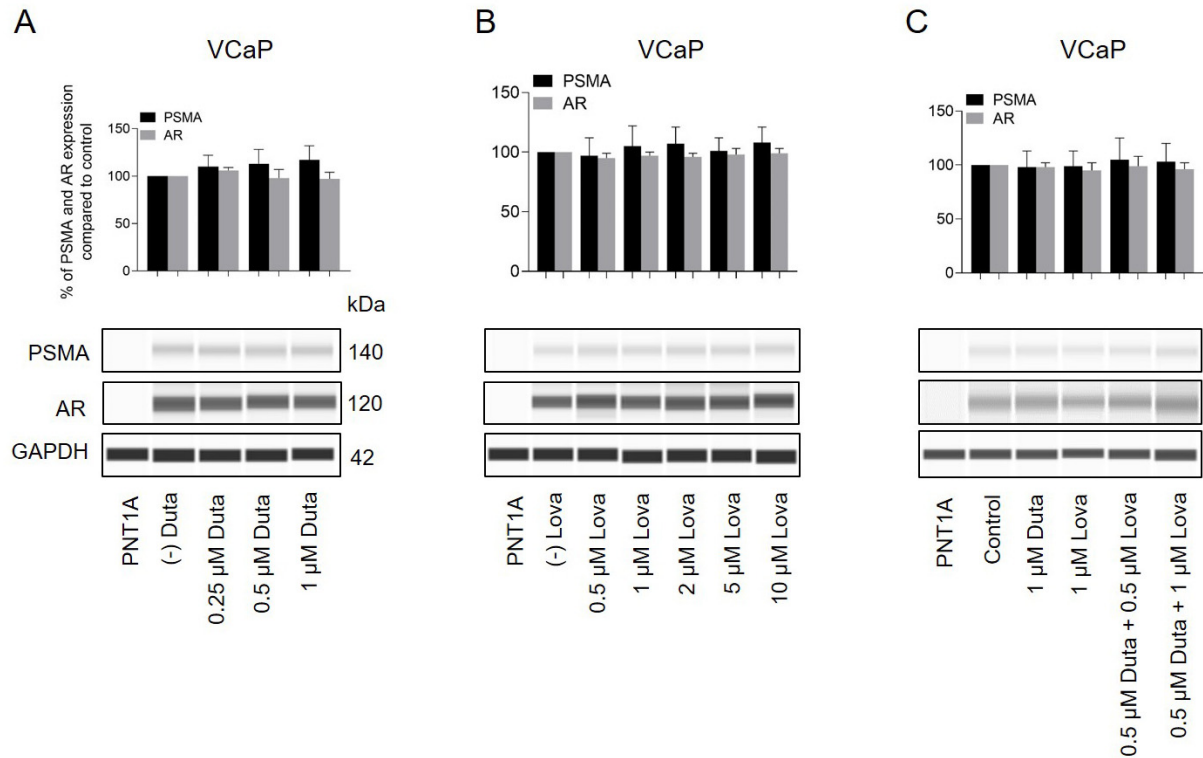

**Supplementary Figure S2.** Whole PSMA protein expression analyzed by protein simple immunoblotting. VCaP cells were treated for 7 days with different concentrations of (A) Duta (0.25, 0.5 and 1  $\mu$ M), (B) Lova (0.5, 1, 2, 5 and 10  $\mu$ M) and (C) Duta + Lova combination (0.5  $\mu$ M Duta + 0.5  $\mu$ M Lova and 0.5  $\mu$ M Duta + 1  $\mu$ M Lova). Data is shown as mean with standard error of the mean ( $\pm$  SEM) of three independent experiments. AR, androgen receptor; PSMA, prostate specific membrane antigen.
